# Supplementary material
Source: PubMed Central journal article supplement (PMC6459213)
Supplement: jamaophthalmol-137-372-s003.pdf [file jamaophthalmol-137-372-s003.pdf]

## Data Sharing Statement

Gillies. Effect of Ranibizumab and Aflibercept on Best-Corrected Visual Acuity in Treat-and-Extend for Neovascular Age-Related Macular Degeneration. *JAMA Ophthalmol*. Published January 24, 2019. 10.1001/jamaophthalmol.2018.6776

### Data

**Data available:** No
